# Supplementary material
Source: publisher figshare collection journal article supplement (https://tandf.figshare.com/articles/dataset/_/11993580)
Supplement: Supplementary file 1 [file 1]

Archive with 3 entries (3 files):
- Supplementary Figure Caption.pdf
- ncer-2019-or-0898-File008.tif
- ncer-2019-or-0898-File009.tif
