# Supplementary material
Source: publisher figshare collection journal article supplement (https://tandf.figshare.com/articles/dataset/_/11993580)
Supplement: Supplementary file 1 [file 1 › Supplementary Figure Caption.pdf]

Supplementary figure 1. The effect of LIRA on the expression of TXNIP in HG. The data are expressed as the mean  $\pm$  SD (n = 3 in each group) and are representative of three independent experiments. \*p < 0.05, \*\*p < 0.01.

Supplementary figure 2. The effect of LIRA on the expression of GLP-1R in HG. Western blot and densitometric analysis was used to evaluate the expression levels of GLP-1R with different concentration treatment(A) and at different time point(B). The data are expressed as the mean  $\pm$  SD (n = 3 in each group) and are representative of three independent experiments. \*p < 0.05, \*\*p < 0.01.
