# Supplementary material
Source: publisher figshare collection journal article supplement (https://tandf.figshare.com/articles/dataset/_/11993580)

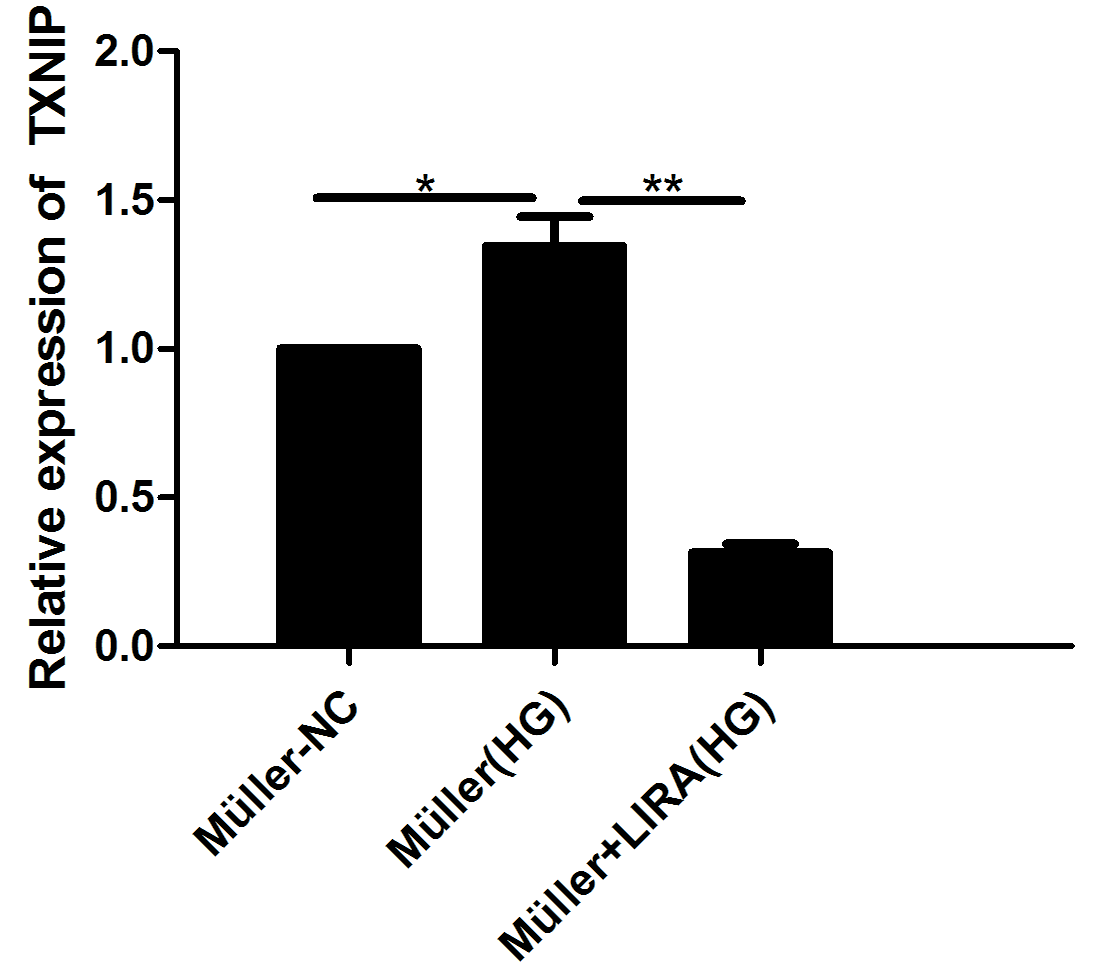

Supplement: Supplementary file 1 [file 1 › ncer-2019-or-0898-File008.tif]

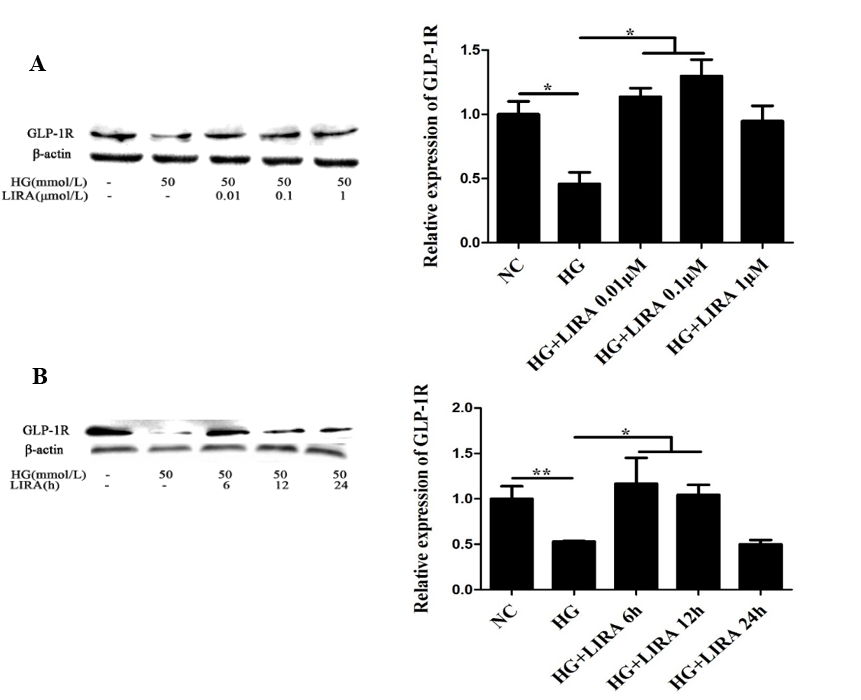

Supplement: Supplementary file 1 [file 1 › ncer-2019-or-0898-File009.tif]
